# Supplementary material for: The role of annexin A1 peptide Ac2-26 in regulating PI3K/Akt signaling pathway to reduce lung injury after cardiopulmonary bypass in rats
Source: Research Square preprint supplement (doi:10.21203/rs.3.rs-391368/v1), 2021-04-09
Supplement: Supplementary file 1 [file b5a9cb069787feb0a4b1f7c2.docx]

**Table 1. Pathological scores of lung tissue damage**

| | Pathological changes in lung pathological status | | | | --- | --- | --- | | Structural damage | 0 | Pulmonary blood vessels, interstitial, alveolar and bronchial normal | |  | 1 | Interstitial and alveolar hemorrhage edema range<25% | |  | 2 | Interstitial widening, alveolar hemorrhage edema range 25-50% | |  | 3 | Interstitial significantly widened, alveolar hemorrhage edema range 50-75% | |  | 4 | Interstitial significantly widened, alveolar hemorrhage edema range >75% | | Inflammation | 0 | None | |  | 1 | Interstitial small amount of neutrophils | |  | 2 | Interstitial and some alveolar spaces have more neutrophils | |  | 3 | Neutrophils and agglomerates in most of the alveolar spaces |   **Table 2. Comparison of the PaO(2)/FiO(2) (OI) at different time points in each group of rats (*n* = 6,)** | | | | |
| --- | --- | --- | --- | --- | --- | --- | --- | --- | --- | --- | --- | --- | --- | --- | --- | --- | --- | --- | --- | --- | --- | --- | --- | --- | --- | --- | --- | --- | --- | --- | --- | --- | --- | --- |
| Group | T1 | T2 | T3 |
| **S** | 420.18±29.96 | 365.17±36.35▲ | 357.12±34.08▲ |
| **IR** | 393.43±31.09 | 294.71±29.34▲a | 136.33±31.16▲△a |
| **D** | 387.88±27.67 | 226.30±34.62▲ab | 147.17±27.45▲△a |
| **A** | 415.66±23.37 | 331.83±47.62▲c | 194.36±33.02▲△ab |
| **AL** | 401.51±38.54 | 200.91±38.67▲abd | 135.67±35.97▲△ad |
| Note: Compared with T1, ▲*P*< 0.05. compared with T2, △*P*< 0.05. compared with group S, a*p*< 0.05 compared with group IR, b*p*< 0.05 compared with group D, c*p*< 0.05 compared with group A, d*p*< 0.05. | | | | |
| **Table 3. Comparison of the *P*(A-a)O(2)/PaO(2) (RI) at different time points in each group of rats (*n* = 6, )** | | | | |
|  | | | | |

| Group | T1 | T2 | T3 |
| --- | --- | --- | --- |
| **S** | 0.62±0.14 | 1.08±0.45▲ | 1.10±0.18▲ |
| **IR** | 0.66±0.14 | 1.45±0.19▲ | 4.28±0.84▲△a |
| **D** | 0.81±0.18 | 1.94±0.59▲a | 3.65±1.01▲△a |
| **A** | 0.53±0.18 | 1.01±0.27▲ | 2.54±0.39▲△ab |
| **AL** | 0.80±0.24 | 1.98±0.53▲ad | 4.38±1.15▲△ad |
| Note: Compared with T1, ▲*P*＜0.05. compared with T2, △*P*＜0.05. compared with S group, a*p*<0.05.compared with IR group, b*p*<0.05.compared with D group, c*p*<0.05.compared with A group, d*p*<0.05. | | | |

| **Table 4. Comparison of the *P*(A-a)O(2) at different time points in each group of rats (*n* = 6, )** | | | |
| --- | --- | --- | --- |
| Group | T1 | T2 | T3 |
| **S** | 238.94±40.03 | 283.83±25.23▲ | 284.47±14.60▲ |
| **IR** | 235.29±28.78 | 336.00±21.00▲ | 502.65±22.62▲△a |
| **D** | 234.50±37.35 | 380.76±45.56▲a | 486.50±14.00▲△a |
| **A** | 237.63±17.45 | 296.63±32.49▲ | 424.30±27.35▲△ab |
| **AL** | 239.97±35.93 | 368.33±38.12▲ad | 484.83±28.53▲△ad |
| Note: Compared with T1, ▲*P*＜0.05. compared with T2, △*P*＜0.05. compared with S group, a*p*<0.05.compared with IR group, b*p*<0.05.compared with D group, c*p*<0.05.compared with A group, d*p*<0.05. | | | |

**Table 5. Comparison of the lung tissue pathological damage scores at different time points in each group of rats (*n* = 6, ) at T3**

| G**roup S IR D A AL** |
| --- |
| scores 0.82±0.11 4.76±0.26 a 4.22±0.23 a 2.49±0.20 abc 4.98±0.65 ad |

Note: Compared with S group, a*p*<0.05.compared with IR group, b*p*<0.05.compared with D group, c*p*<0.05.compared with A group, d*p*<0.05.

**Table 6. Comparison of the TNF-α in lung tissue in each group of rats (*n* = 6, ) at T3**

| G**roup S IR D A AL** |
| --- |
| TNF-α 34.52±3.15 93.33±4.46a 91.07±1.34a 57.02±6.60abc 75.88±6.49ad |

Note: Compared with S group, a*p*<0.05.compared with IR group, b*p*<0.05.compared with D group, c*p*<0.05.compared with A group, d*p*<0.05.

**Table 7. Comparison of the IL-6 and total protein in BALF in each group of rats (*n* = 6, ) at T3**

| G**roup S IR D A AL** |
| --- |
| IL-6(pg/mL) 27.86±1.54 38.84±3.89a 40.18±1.48a 33.56±2.65abc 39.57±4.06ad  total proteinin  (mg/mL) 1.49±0.20 6.81±0.55a 7.14±0.32a 3.41±0.20abc 6.15±0.52ad |

Note: Compared with S group, a*p*<0.05.compared with IR group, b*p*<0.05.compared with D group, c*p*<0.05.compared with A group, d*p*<0.05.

**Table 8. Comparison of the PI3K, p-PI3K, Akt, and p-Akt in lung tissue in each group of rats (*n* = 6, ) at T3**

| G**roup S IR D A AL** |
| --- |
| PI3K/β-actin 0.381±0.014 0.586±0.021a 0.608±0.024a 0.751±0.013abc 0.429±0.015abcd  p-PI3K/PI3K 0.226±0.011 0.551±0.025a 0.558±0.031a 0.684±0.035abc 0.537±0.016ad  Akt/β-actin 0.635±0.019 0.629±0.014 0.619±0.008 0.630±0.022 0.605±0.026  p-Akt/Akt 0.251±0.016 1.066±0.090a 1.108±0.125a 1.381±0.040abc 1.104±0.131ad |

Note: Compared with S group, a*p*<0.05.compared with IR group, b*p*<0.05.compared with D group, c*p*<0.05.compared with A group, d*p*<0.05.

**Table 9. Comparison of the NF-κB(p65), p-NF-κB(p65), and AnxA1 in lung tissue in each group of rats (*n* = 6, ) at T3**

| G**roup S IR D A AL** |
| --- |
| NF-κB/β-actin 0.474±0.013 0.564±0.012a  0.552±0.015a 0.533±0.007 ab 0.566±0.013ad  p-NF-κB/NF-κB 0.247±0.018 0.971±0.043a 0.957±0.022a 0.792±0.040 abc 0.915±0.029ad  AnxA1/β-actin 1.264±0.031 1.577±0.113a 1.564±0.050a 1.930±0.056abc 1.544±0.051ad  AnxA1(37kD)/β-actin 0.820±0.011 0.558±0.004a 0.578±0.025a 0.710±0.006abc 0.286±0.010abcd  AnxA1(33kD)/β-actin 0.459±0.022 0.977±0.008a 0.951±0.009a 1.250±0.028abc 1.239±0.018abc |

Note: Compared with S group, a*p*<0.05.compared with IR group, b*p*<0.05.compared with D group, c*p*<0.05.compared with A group, d*p*<0.05.
